# Supplementary material for: The Genotypic Variability among Short-Season Soybean Cultivars for Nitrogen Fixation under Drought Stress
Source: MDPI journal article supplement (doi:10.3390/plants12051004), 2023-02-22
Supplement: s1 [file s1]

**Supplementary Table S1.** The list of 103 short season soybean genotypes used in the study

|              |           |               |               |               |
|--------------|-----------|---------------|---------------|---------------|
| 9004         | Casino    | Lotus         | OAC 09-01C    | OAC Wallace   |
| 9063         | Colby     | Madison       | OAC 09-17C    | OAC Walton    |
| 90A01        | Costaud   | Mandarin      | OAC 09-22C    | OAC Woodstock |
| 90A07        | Dares     | Maple Amber   | OAC 09-35C    | Ohgata        |
| 90B11        | Delta     | Maple Arrow   | OAC Avatar    | OT09-03       |
| 91M10        | DH420     | Maple Belle   | OAC Ayton     | OT11-01       |
| AC 2001      | DH530     | Maple Donovan | OAC Bayfield  | Phoenix       |
| AC Brant     | DH618     | Maple Glen    | OAC Carman    | Roland        |
| AC Bravor    | DH748     | Maple Isle    | OAC Champion  | S03-W4        |
| AC Glengarry | Dundas    | Maple Presto  | OAC Clinton   | Toki          |
| AC Harmony   | Evans     | Maple Ridge   | OAC Drayton   | Venus         |
| AC Hercule   | Flambeau  | Mario         | OAC Ginty     | Victoria      |
| AC Orford    | Gaillard  | McCall        | OAC Gretna    | OAC Elora     |
| AC Proteina  | Gentleman | Misty         | OAC Kent      | OAC Perth     |
| AC Proteus   | Heather   | Naya          | OAC Lakeview  | OAC Stratford |
| Albinos      | Jari      | OAC 01-26     | OAC Lauralain | PS 36         |
| Alta         | Jutra     | OAC 07-04C    | OAC Madoc     | QS5030.46Bp   |
| Altesse      | Kamichis  | OAC 07-06C    | OAC Morris    | SECAN 07-27C  |
| Altona       | Katrina   | OAC 07-26C    | OAC Oxford    |               |
| Amasa        | KG 41     | OAC 08-11C    | OAC Petrel    |               |
| Auriga       | Korada    | OAC 08-21C    | OAC Prudence  |               |
| Bloomfield   | Krios     | OAC 08-22C    | OAC Purdy     |               |
