# Supplementary material for: The Genotypic Variability among Short-Season Soybean Cultivars for Nitrogen Fixation under Drought Stress
Source: MDPI journal article supplement (doi:10.3390/plants12051004), 2023-02-22
Supplement: s1 [file s1]

**Supplementary Table S2**

Ranking of soybean cultivars based on the percentage nitrogen derived from the atmosphere (%Ndfa) and grain yield under 30% field capacity.

| <b>Soybean Cultivars</b> | <b>%Ndfa</b> | <b>Rank</b> | <b>Grain yield (g plant<sup>-1</sup>)</b> | <b>Rank</b> |
|--------------------------|--------------|-------------|-------------------------------------------|-------------|
| OAC Champion             | 94.33        | 1           | 23.06                                     | 16          |
| DH748                    | 93.76        | 2           | 30.87                                     | 1           |
| OAC Oxford               | 92.39        | 3           | 25.30                                     | 6           |
| Toki                     | 92.32        | 4           | 20.02                                     | 34          |
| OAC Wallace              | 91.93        | 5           | 24.95                                     | 7           |
| Victoria                 | 91.51        | 6           | 24.31                                     | 12          |
| OAC Ginty                | 91.33        | 7           | 26.56                                     | 3           |
| OAC Stratford            | 91.22        | 8           | 24.28                                     | 13          |
| S03-W4                   | 90.92        | 9           | 20.42                                     | 31          |
| OAC Kent                 | 90.84        | 10          | 21.51                                     | 25          |
| Roland                   | 90.50        | 11          | 20.64                                     | 28          |
| OAC Gretna               | 90.30        | 12          | 22.46                                     | 21          |
| SECAN 07-27C             | 90.25        | 13          | 20.59                                     | 30          |
| OAC Bayfield             | 90.15        | 14          | 22.96                                     | 17          |
| OAC Lakeview             | 90.11        | 15          | 24.03                                     | 15          |
| OAC Avatar               | 90.10        | 16          | 26.94                                     | 2           |
| OAC Clinton              | 90.00        | 17          | 18.88                                     | 39          |
| OAC 08-22C               | 89.85        | 18          | 19.83                                     | 35          |
| OAC Woodstock            | 89.55        | 19          | 24.07                                     | 14          |
| OAC Purdy                | 89.09        | 20          | 20.63                                     | 29          |
| Jutra                    | 88.95        | 21          | 24.95                                     | 8           |
| OAC Madoc                | 88.87        | 22          | 22.10                                     | 22          |
| OAC Perth                | 88.83        | 23          | 24.66                                     | 9           |
| PS 36                    | 88.81        | 24          | 22.95                                     | 18          |
| Venus                    | 88.76        | 25          | 22.67                                     | 20          |
| OAC Drayton              | 88.49        | 26          | 22.73                                     | 19          |
| QS5030.46Bp              | 87.53        | 27          | 20.34                                     | 32          |
| OAC Ayton                | 87.21        | 28          | 21.51                                     | 24          |
| OAC Morris               | 87.09        | 29          | 24.34                                     | 11          |
| 90B11                    | 87.03        | 30          | 11.13                                     | 78          |
| Krios                    | 86.90        | 31          | 19.38                                     | 37          |
| OAC 01-26                | 86.85        | 32          | 16.38                                     | 52          |
| DH530                    | 86.31        | 33          | 21.64                                     | 23          |
| Phoenix                  | 86.29        | 34          | 19.40                                     | 36          |
| OAC Petrel               | 85.65        | 35          | 17.60                                     | 45          |
| OT11-01                  | 85.52        | 36          | 17.15                                     | 46          |
| 91M10                    | 85.16        | 37          | 24.59                                     | 10          |
| OAC 09-35C               | 85.08        | 38          | 26.10                                     | 4           |
| AC Bravor                | 84.76        | 39          | 20.10                                     | 33          |
| AC Proteus               | 84.75        | 40          | 8.45                                      | 91          |
| OAC Lauralain            | 84.13        | 41          | 25.63                                     | 5           |

|              |       |    |       |    |
|--------------|-------|----|-------|----|
| OAC Walton   | 83.65 | 42 | 21.32 | 26 |
| Mario        | 83.19 | 43 | 21.00 | 27 |
| Kamichis     | 82.75 | 44 | 16.94 | 48 |
| OAC 08-21C   | 82.18 | 45 | 18.10 | 42 |
| Katrina      | 81.29 | 46 | 16.25 | 53 |
| Maple Arrow  | 80.60 | 47 | 13.68 | 63 |
| OAC Carman   | 80.53 | 48 | 15.63 | 57 |
| Evans        | 80.34 | 49 | 18.38 | 40 |
| Maple Amber  | 80.33 | 50 | 8.65  | 89 |
| Amasa        | 79.62 | 51 | 17.93 | 43 |
| Dares        | 79.59 | 52 | 17.05 | 47 |
| Madison      | 78.40 | 53 | 16.80 | 49 |
| Delta        | 78.39 | 54 | 17.75 | 44 |
| OAC Prudence | 78.29 | 55 | 15.72 | 56 |
| OAC Elora    | 78.14 | 56 | 14.17 | 60 |
| Misty        | 78.00 | 57 | 18.88 | 38 |
| Maple Presto | 77.43 | 58 | 7.51  | 94 |
| OAC 07-26C   | 76.97 | 59 | 15.23 | 58 |
| Colby        | 76.60 | 60 | 16.58 | 50 |
| Jari         | 75.68 | 61 | 14.73 | 59 |
| Casino       | 75.23 | 62 | 13.77 | 62 |
| AC Hercule   | 74.91 | 63 | 11.76 | 74 |
| Flambeau     | 74.86 | 64 | 8.73  | 88 |
| AC Proteina  | 73.23 | 65 | 14.10 | 61 |
| Lotus        | 72.86 | 66 | 11.78 | 73 |
| Dundas       | 72.83 | 67 | 16.23 | 54 |
| OAC 08-11C   | 71.57 | 68 | 18.28 | 41 |
| Ohgata       | 70.52 | 69 | 16.49 | 51 |
| AC Brant     | 69.51 | 70 | 13.40 | 65 |
| DH420        | 68.01 | 71 | 11.53 | 77 |
| KG 41        | 66.50 | 72 | 12.10 | 71 |
| Maple Glen   | 65.50 | 73 | 12.90 | 68 |
| OT09-03      | 64.95 | 74 | 12.60 | 70 |
| OAC 09-22C   | 64.61 | 75 | 16.20 | 55 |
| AC Glengarry | 64.58 | 76 | 13.48 | 64 |
| OAC 09-17C   | 61.66 | 77 | 12.68 | 69 |
| DH618        | 60.66 | 78 | 11.58 | 76 |
| 90A01        | 60.26 | 79 | 9.36  | 84 |
| OAC 07-06C   | 59.95 | 80 | 12.93 | 67 |
| Mandarin     | 58.94 | 81 | 11.63 | 75 |
| Altona       | 58.73 | 82 | 11.83 | 72 |
| Heather      | 55.56 | 83 | 8.03  | 92 |
| Altesse      | 55.43 | 84 | 12.93 | 66 |
| OAC 07-04C   | 54.39 | 85 | 6.73  | 96 |
| Maple Isle   | 53.38 | 86 | 9.41  | 83 |
| 90A07        | 53.10 | 87 | 8.95  | 87 |
| AC Orford    | 51.67 | 88 | 10.33 | 81 |
| Gentleman    | 50.18 | 89 | 9.13  | 86 |

|               |       |     |       |     |
|---------------|-------|-----|-------|-----|
| 9063          | 49.99 | 90  | 9.57  | 82  |
| Maple Ridge   | 48.97 | 91  | 9.25  | 85  |
| Bloomfield    | 48.01 | 92  | 7.73  | 93  |
| Auriga        | 45.96 | 93  | 5.69  | 100 |
| AC 2001       | 43.38 | 94  | 6.23  | 98  |
| McCall        | 41.74 | 95  | 10.57 | 79  |
| Alta          | 39.33 | 96  | 10.39 | 80  |
| Maple Belle   | 36.35 | 97  | 8.55  | 90  |
| 9004          | 35.73 | 98  | 4.75  | 101 |
| Naya          | 34.22 | 99  | 5.95  | 99  |
| Gaillard      | 24.50 | 100 | 7.45  | 95  |
| Albinos       | 23.04 | 101 | 4.18  | 103 |
| Costaud       | 22.00 | 102 | 6.45  | 97  |
| Maple Donovan | 18.23 | 103 | 4.28  | 102 |

---
